## RETRACTION

# Retraction: Identification and characterization of GRIM-1, a cell-death-associated gene product

**Edward R. Hofmann, Shreeram C. Nallar, Limei Lin, Jonathan D'Cunha, Daniel J. Lindner, Xiao Weihua and Dhananjaya V. Kalvakolanu**

The journal has retracted *J. Cell Sci.* (2010) **123**, 2781-2791 (doi:10.1242/jcs.070250) in agreement with the authors.

Concerns were raised about duplications in the western blots shown in Fig. 5C and Fig. 5G. As the authors no longer have the original full blots, they cannot explain how these errors arose. Senior author, Dhananjaya Kalvakolanu, said, 'To be fair to the scientific community and prevent further propagation of these data, it is best to withdraw this paper from the public domain'.

Jonathan D'Cunha could not be contacted, but all other authors agree with this retraction.
